# Supplementary material
Source: PubMed Central journal article supplement (PMC8292178)
Supplement: NIHMS1694759-supplement-1.pdf [file NIHMS1694759-supplement-1.pdf]

**Association between Circulating Protein C Levels and Incident Dementia:**

**the Atherosclerosis Risk in Communities Study**

**Supplementary Tables 1 to 7**

## Supplementary Tables

**Supplementary Table 1.** Ten cognitive and functional assessments administered at the late-life baseline (2011-13, visit 5) and subsequent visits

**Supplementary Table 2.** Association between the covariates and quintile of protein C weighted by stabilized weights based on propensity scores at the midlife baseline

**Supplementary Table 3.** Association between the covariates and quintile of protein C weighted by stabilized weights based on propensity scores at the late-life baseline

**Supplementary Table 4.** Data sources for the determination of incident dementia from the midlife baseline (1987-89, visit 1) to the midlife end point (up to 2013)

**Supplementary Table 5.** Association between protein C levels and incident dementia after excluding APOE  $\epsilon$ 4 homozygotes or carriers

**Supplementary Table 6.** Population characteristics at the late-life baseline (2011-13, visit 5, n=3,614)

**Supplementary Table 7.** Data sources for the determination of incident dementia from the late-life baseline (2011-13, visit 5) to the late-life end point (December 31, 2017)

**Supplementary Table 1.** Ten cognitive and functional assessments administered at the late-life baseline (visit 5) and subsequent visits

Delayed word recall test

Digit symbol substitution test from the Wechsler Adult Intelligence Scale Revised (WAIS-R)

Letter fluency test

Neuropsychology test battery

Logical memory immediate and delayed recall

Incidental learning from the Wechsler Memory Scale-III

Trail making test parts A and B

WAIS-R digits span backward

Boston naming test and animal naming

Mini-mental state examination (MMSE)

**Supplementary Table 2.** Association between covariates and quintile of protein C weighted by stabilized weights based on propensity scores at the midlife baseline

| <b>Variable</b>                           | <b>P-value</b> |
|-------------------------------------------|----------------|
| Male                                      | 9.05E-01       |
| Race                                      | 7.42E-01       |
| APOE ε4                                   | 9.25E-01       |
| < High school                             | 9.97E-01       |
| High school graduate or vocational school | 9.98E-01       |
| College, graduate or professional school  | 1.00E+00       |
| Current smoker                            | 8.90E-01       |
| Prevalent diabetes                        | 9.24E-01       |
| Prevalent hypertension                    | 1.00E+00       |
| Prevalent stroke                          | 8.64E-02       |
| Age                                       | 6.26E-01       |
| Body mass index                           | 3.25E-01       |
| Estimated glomerular filtration rate      | 8.64E-01       |
| Factor VIIIc                              | 7.84E-01       |
| Fibrinogen                                | 8.41E-01       |
| von Willebrand factor                     | 9.81E-01       |
| Platelet count                            | 6.26E-01       |

Generalized linear regression analyses were performed using each covariate as the outcome and the quintiles of protein C as predictors assuming a Gaussian distribution for continuous variable and pseudo-binomial distribution for binary variables. Pseudo-binomial distribution allows for the use of non-integer weights.

P-values were obtained using the anova function comparing a null model with the intercept as the only predictor and a model with the addition of quintiles of protein C as categorical predictors.

Factor VIII, fibrinogen, von Willebrand factor, and platelet count were log2 transformed.

**Supplementary Table 3.** Association between covariates and quintile of protein C weighted by stabilized weights based on propensity scores at the late-life baseline

| <b>Variable</b>                           | <b>P-value</b> |
|-------------------------------------------|----------------|
| Male                                      | 1.44E-02       |
| Race                                      | 6.64E-01       |
| APOE $\epsilon$ 4                         | 9.34E-01       |
| < High school                             | 7.41E-01       |
| High school graduate or vocational school | 7.07E-01       |
| College, graduate or professional school  | 4.70E-01       |
| Current smoker                            | 7.53E-01       |
| Prevalent diabetes                        | 9.96E-01       |
| Prevalent hypertension                    | 9.01E-01       |
| Prevalent stroke                          | 7.94E-02       |
| Age                                       | 9.80E-01       |
| Body mass index                           | 9.66E-01       |
| Estimated glomerular filtration rate      | 7.78E-01       |
| Global cognition Z score                  | 8.83E-01       |
| Factor VIII                               | 9.87E-01       |
| von Willebrand factor                     | 9.70E-01       |
| Platelet count                            | 4.31E-01       |

Generalized linear regression analyses were performed using each covariate as the outcome and the quintiles of protein C as predictors assuming a Gaussian distribution for continuous variable and pseudo-binomial distribution for binary variables. Pseudo-binomial distribution allows for the use of non-integer weights

P-values were obtained using the anova function comparing a null model with the intercept as the only predictor and a model with the addition of quintiles of protein C as categorical predictors.

Factor VIII and von Willebrand factor and platelet count were log<sub>2</sub> transformed.

**Supplementary Table 4.** Data sources for the determination of incident dementia from the midlife baseline (visit 1, 1987-89) to the midlife end point (visit 5, 2011-13)

| <b>Primary data source</b>            | <b>Dementia incidence</b> | <b>%</b>   | <b>Other data sources</b>                                                                                                 |
|---------------------------------------|---------------------------|------------|---------------------------------------------------------------------------------------------------------------------------|
| Comprehensive cognition assessment    | 307                       | 22.1       | 38 cases had hospital discharge code of dementia                                                                          |
| TICS                                  | 93                        | 6.7        | 6 cases had hospital discharge code of dementia                                                                           |
| CDR and or FAQ                        | 538                       | 38.7       | 235 cases also had hospital discharge code of dementia, and 75 cases had ICD code of dementia on their death certificates |
| ICD code at hospitalization discharge | 374                       | 26.9       |                                                                                                                           |
| ICD code on death certificate         | 77                        | 5.5        |                                                                                                                           |
| <b>Total</b>                          | <b>1389</b>               | <b>100</b> |                                                                                                                           |

Abbreviation. TICS, Telephone Interview for Cognitive Status; CDR, Clinical Dementia Rating; FAQ, Functional Activities Questionnaire; ICD, International Classification of Diseases.

**Supplementary Table 5.** Association between protein C levels and incident dementia after excluding APOE ε4 homozygotes or carriers

|                           | N (% case)   | Quintile 1 | Quintile 2        | Quintile 3        | Quintile 4        | Quintile 5        | P-value for trend | Wald test p-value |
|---------------------------|--------------|------------|-------------------|-------------------|-------------------|-------------------|-------------------|-------------------|
| <b>Midlife baseline</b>   |              |            |                   |                   |                   |                   |                   |                   |
| Model 5*                  | 14,462 (9.6) | Reference  | 0.75 (0.61, 0.91) | 0.88 (0.73, 1.06) | 0.83 (0.69, 0.99) | 0.80 (0.66, 0.96) | 0.04              | 0.04              |
| Model 6                   | 14,085 (9.1) | Reference  | 0.73 (0.59, 0.90) | 0.85 (0.70, 1.03) | 0.80 (0.66, 0.97) | 0.78 (0.64, 0.95) | 0.03              | 0.03              |
| Model 7                   | 10,010 (7.4) | Reference  | 0.77 (0.59, 1.00) | 0.83 (0.64, 1.06) | 0.80 (0.63, 1.02) | 0.78 (0.60, 1.02) | 0.17              | 0.28              |
| <b>Late-life baseline</b> |              |            |                   |                   |                   |                   |                   |                   |
| Model 5**                 | 3,614 (9.8)  | Reference  | 1.26 (0.92, 1.72) | 0.78 (0.56, 1.10) | 0.73 (0.50, 1.07) | 0.84 (0.55, 1.28) | 0.04              | 0.02              |
| Model 6                   | 3,542 (9.4)  | Reference  | 1.21 (0.88, 1.66) | 0.80 (0.56, 1.13) | 0.74 (0.50, 1.10) | 0.80 (0.52, 1.24) | 0.04              | 0.05              |
| Model 7                   | 2,620 (8.3)  | Reference  | 1.01 (0.66, 1.53) | 0.79 (0.52, 1.22) | 0.71 (0.45, 1.11) | 0.62 (0.37, 1.04) | 0.01              | 0.20              |

\* The results of Model 5 at the midlife baseline were copied from Table 2 to facilitate the comparison of model results

\*\* The results of Model 5 at the late-life baseline were copied from Table 3 to facilitate the comparison of model results

Compared with Model 5, Model 6 removed APOE ε4 homozygotes (midlife, n=377; late life, n=72)

Compared with Model 5, Model 7 removed APOE ε4 carriers, both homozygotes and heterozygotes (midlife, n=4,452; late life, 994)

Models 5, 6 and 7 were evaluated incorporating stabilized weights based on the inverse of propensity scores.

Covariates:

Model 5: age, sex, race-center, education levels, APOE ε4 carrier status, vascular factors (body mass index, current smoking status, prevalent stroke, diabetes and hypertension status, estimated glomerular filtration rate), coagulants (factor VIII, von Willebrand factor) + platelet count, incident stroke as time-varying covariate

Model 6 (same as Model 5):

Model 7: removed APOE ε4 carrier status from the list of covariates in Model 5

**Supplementary Table 6.** Population characteristics at the late-life baseline (2011-13, visit 5, n=3,614)

|                                                                                          | <b>Overall</b>    | <b>Quintile 1</b>    | <b>Quintile 2</b>   | <b>Quintile 3</b>   | <b>Quintile 4</b>   | <b>Quintile 5</b>   | <b>P-value</b> |
|------------------------------------------------------------------------------------------|-------------------|----------------------|---------------------|---------------------|---------------------|---------------------|----------------|
| Range, RFU/1000                                                                          | 38.18, 103.57     | 38.18, 66.11         | 66.13, 72.25        | 72.26, 77.64        | 77.64, 84.88        | 84.89, 103.57       |                |
| <b>Variable</b>                                                                          |                   |                      |                     |                     |                     |                     |                |
| N                                                                                        | 3,614             | 723                  | 723                 | 722                 | 723                 | 723                 |                |
| Age, year, mean (SD)                                                                     | 75.1 (4.9)        | 75.8 (5.1)           | 75.5 (5)            | 75.2 (5.1)          | 74.7 (4.8)          | 74.2 (4.5)          | <0.001         |
| Male, n (%)                                                                              | 1492 (41.3)       | 343 (47.4)           | 310 (42.9)          | 304 (42.1)          | 280 (38.7)          | 255 (35.3)          | <0.001         |
| Self-reported black, n (%)                                                               | 634 (17.5)        | 179 (24.8)           | 146 (20.2)          | 139 (19.3)          | 99 (13.7)           | 71 (9.8)            | <0.001         |
| APOE ε4 carrier status, n (%)                                                            | 994 (27.5)        | 201 (27.8)           | 189 (26.1)          | 207 (28.7)          | 187 (25.9)          | 210 (29)            | 0.55           |
| Education level, n (%)                                                                   |                   |                      |                     |                     |                     |                     | <0.001         |
| < High school                                                                            | 419 (11.6)        | 131 (18.1)           | 73 (10.1)           | 85 (11.8)           | 81 (11.2)           | 49 (6.8)            |                |
| High school graduate or vocational school                                                | 1555 (43.0)       | 311 (43.0)           | 315 (43.6)          | 322 (44.6)          | 283 (39.1)          | 324 (44.8)          |                |
| College, graduate or professional school                                                 | 1640 (45.4)       | 281 (38.9)           | 335 (46.3)          | 315 (43.6)          | 359 (49.7)          | 350 (48.4)          |                |
| BMI, kg/m <sup>2</sup> , mean (SD)                                                       | 28.6 (5.5)        | 29.6 (6.1)           | 29.1 (5.6)          | 28.7 (5.3)          | 27.9 (5.2)          | 27.7 (5.0)          | <0.001         |
| Current smoker, n (%)                                                                    | 216 (6.0)         | 49 (6.8)             | 46 (6.4)            | 35 (4.8)            | 41 (5.7)            | 45 (6.2)            | 0.58           |
| Diabetes, n (%)                                                                          | 1104 (30.6)       | 256 (35.4)           | 233 (32.2)          | 221 (30.6)          | 198 (27.4)          | 196 (27.1)          | 0.002          |
| Hypertension, n (%)                                                                      | 2622 (72.6)       | 579 (80.1)           | 558 (77.2)          | 516 (71.5)          | 501 (69.3)          | 468 (64.7)          | <0.001         |
| Prevalent stroke, n (%)                                                                  | 89 (2.5)          | 29 (4.0)             | 19 (2.6)            | 16 (2.2)            | 10 (1.4)            | 15 (2.1)            | 0.02           |
| Prevalent atrial fibrillation, n (%)                                                     | 113 (3.13)        | 28 (3.9)             | 22 (3)              | 24 (3.3)            | 22 (3)              | 17 (2.4)            | 0.58           |
| eGFR, mL/min/1.73m <sup>2</sup> , mean (SD)                                              | 70.3 (16.6)       | 63.7 (18.6)          | 68 (16.7)           | 70 (16.2)           | 73.7 (14.6)         | 75.8 (13.8)         | <0.001         |
| Global cognition Z score, median (25 <sup>th</sup> , 75 <sup>th</sup> percentile)        | -0.44 (-1, 0.08)  | -0.70 (-1.22, -0.14) | -0.40 (-1.04, 0.07) | -0.50 (-1.04, 0.10) | -0.30 (-0.88, 0.13) | -0.30 (-0.79, 0.17) | <0.001         |
| Platelet count, K/uL, median (25 <sup>th</sup> , 75 <sup>th</sup> percentile)            | 240 (198, 290)    | 235 (192, 289)       | 240 (199, 290)      | 243 (199, 287)      | 240 (198, 289)      | 241 (201, 294)      | 0.26           |
| Factor VIII, RFU/1000, median (25 <sup>th</sup> , 75 <sup>th</sup> percentile)           | 9.3 (7.9, 11.1)   | 9.3 (7.9, 11.2)      | 9.5 (7.9, 11.2)     | 9.3 (8.0, 11.0)     | 9.4 (7.8, 11.1)     | 9.3 (7.9, 11.0)     | 0.77           |
| von Willebrand factor, RFU/1000, median (25 <sup>th</sup> , 75 <sup>th</sup> percentile) | 13.6 (10.1, 18.4) | 15.1 (11.4, 19.9)    | 14.1 (10.8, 19.6)   | 13.4 (10.0, 18.4)   | 13 (9.5, 17.5)      | 12.4 (9.0, 16.6)    | <0.001         |

Abbreviation. BMI, body mass index; eGFR, estimated glomerular filtration rate; RFU, relative fluorescence unit



**Supplementary Table 7.** Data sources for the determination of incident dementia from the late-life baseline (2011-13, visit 5) to the late-life end point (December 31, 2017)

| <b>Primary data source</b>                         | <b>Dementia incidence</b> | <b>%</b>   | <b>Other data sources</b>                        |
|----------------------------------------------------|---------------------------|------------|--------------------------------------------------|
| Comprehensive cognition and functional assessment  | 132                       | 37.4       | 20 cases had hospital discharge code of dementia |
| Alzheimer's disease 8-Item Informant Questionnaire | 125                       | 35.4       | 42 cases had hospital discharge code of dementia |
| Six Item Screener                                  | 24                        | 6.8        | 2 cases had hospital discharge code of dementia  |
| ICD code at hospitalization discharge              | 68                        | 19.3       |                                                  |
| ICD code on death certificate                      | 4                         | 1.1        |                                                  |
| <b>Total</b>                                       | <b>353</b>                | <b>100</b> |                                                  |

Abbreviation. ICD, International Classification of Diseases.

**Association between Circulating Protein C Levels and Incident Dementia:**

**the Atherosclerosis Risk in Communities Study**

**Supplementary Figures 1 to 4**

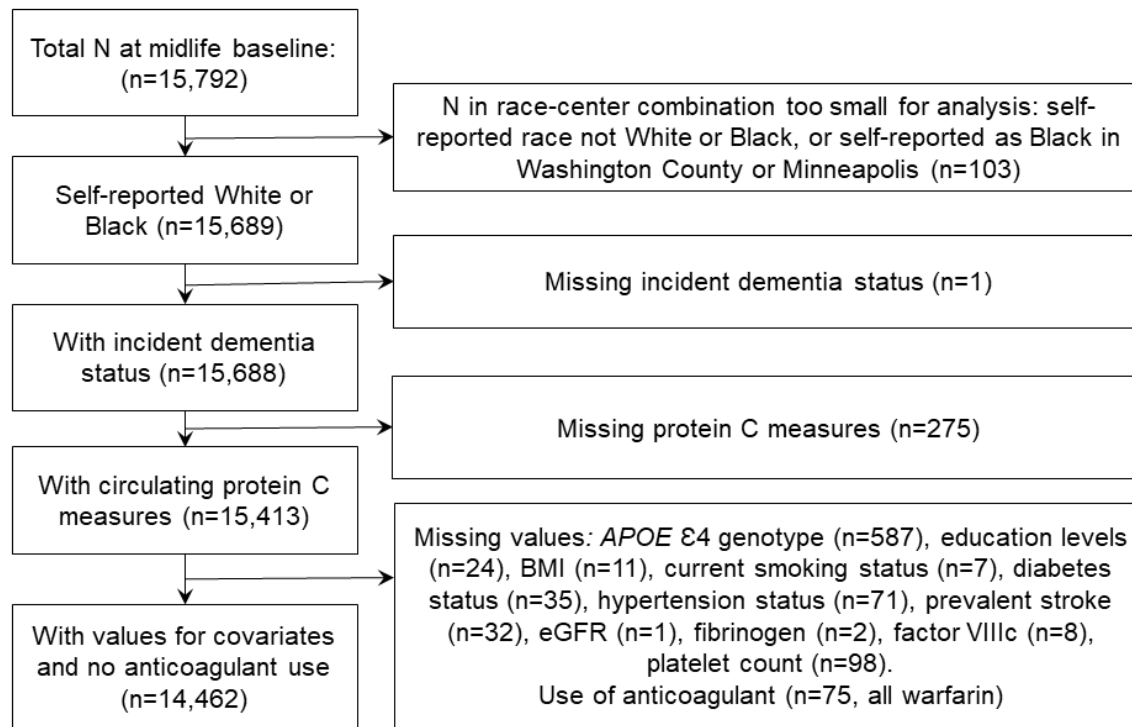

3

**Supplementary Figure 1.** Flowchart of participant inclusion at the midlife baseline (1987-89, visit 1) with the number of participants excluded due to missing values in covariates, sample size in race-center combinations that were too small for analysis, and the use of warfarin. Prevalent dementia status at the midlife baseline was not assessed. Given that the age range of these participants at midlife were from 44 to 66, we assumed all participants did not have prevalent dementia at the midlife baseline.

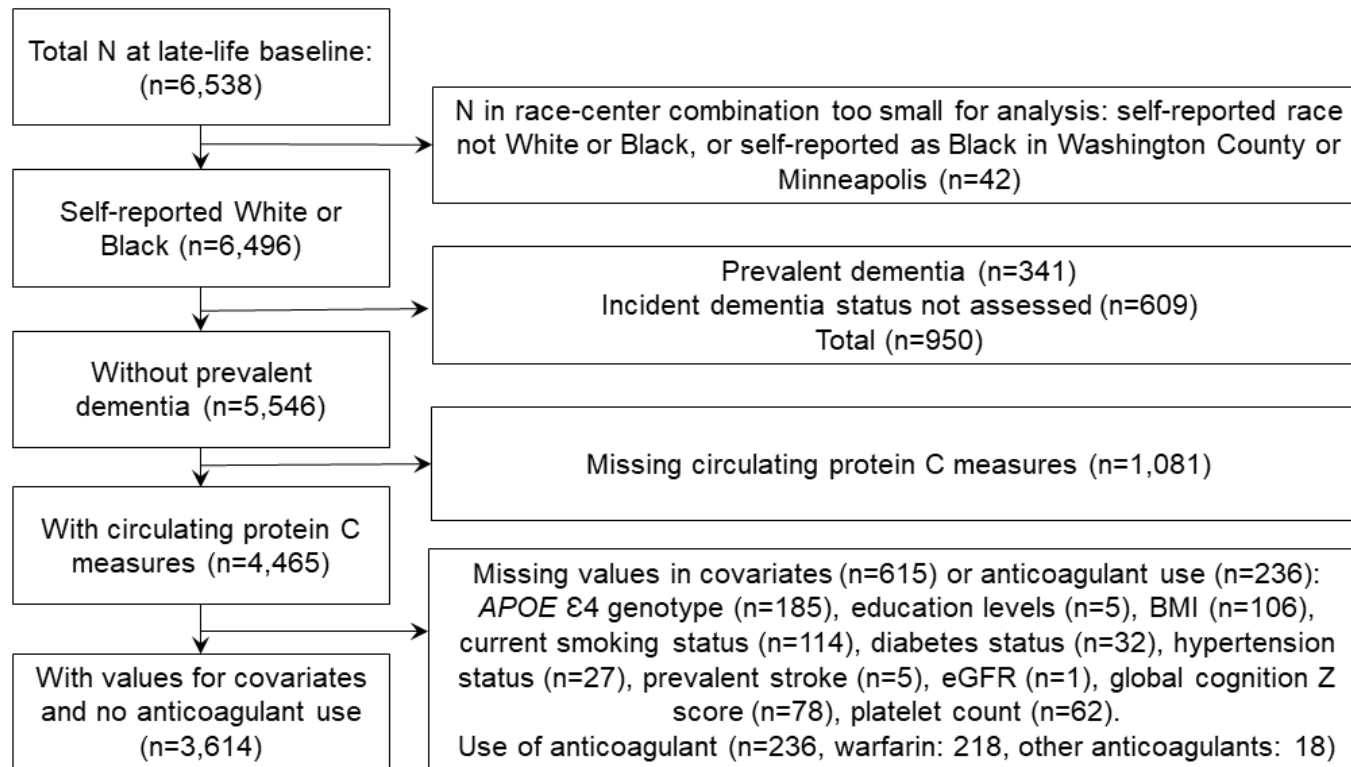

**Supplementary Figure 2.** Flowchart of participant inclusion at the late-life baseline (2011-13, visit 5) with the number of participants excluded due to missing values in covariates, sample size in race-center combinations that were too small for analysis, and the use of anticoagulant.

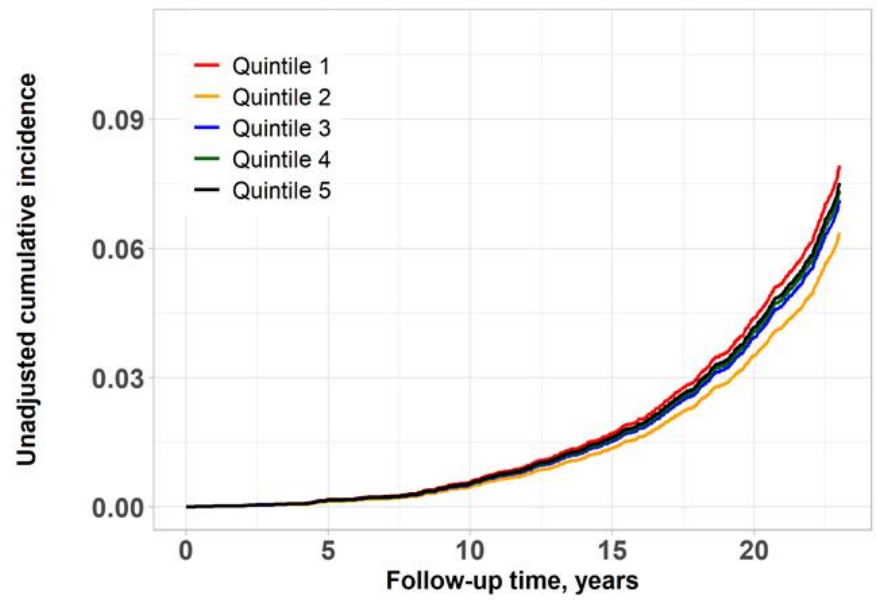

|            | Number at risk |      |      |      |      |
|------------|----------------|------|------|------|------|
| Quintile 1 | 2809           | 2681 | 2487 | 2206 | 1904 |
| Quintile 2 | 2738           | 2639 | 2454 | 2235 | 1939 |
| Quintile 3 | 3011           | 2894 | 2717 | 2493 | 2156 |
| Quintile 4 | 2963           | 2863 | 2698 | 2445 | 2125 |
| Quintile 5 | 2941           | 2833 | 2674 | 2416 | 2122 |

**Supplementary Figure 3.** Crude cumulative incident from the midlife baseline by quintiles of protein C levels

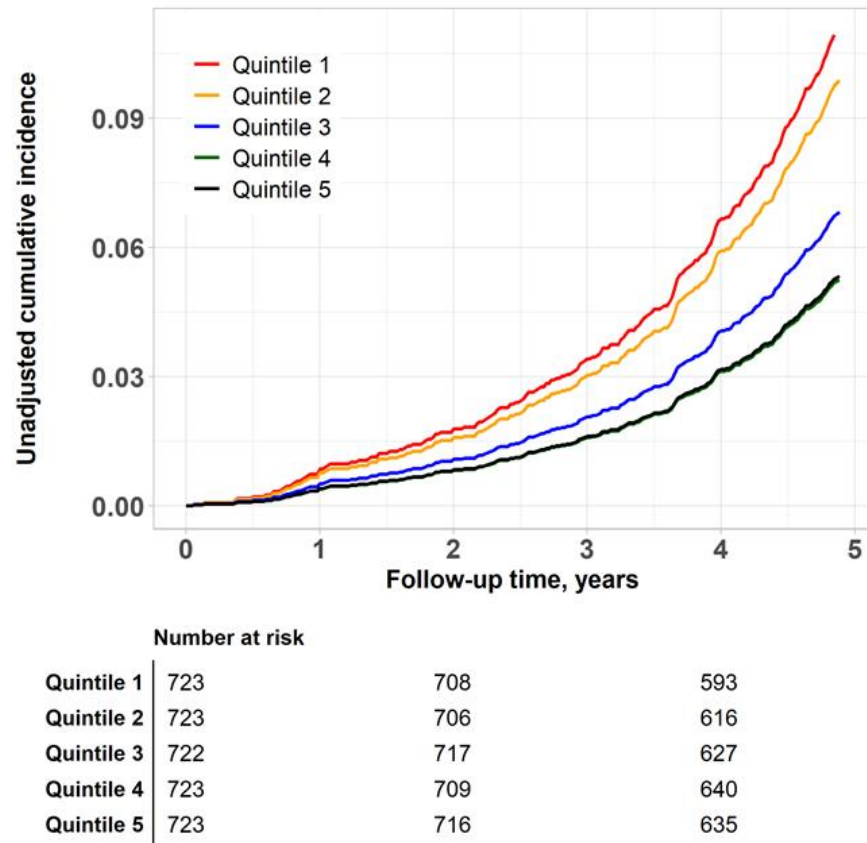

**Supplementary Figure 4.** Crude cumulative incident from the late-life baseline by quintiles of protein C levels. The curves of quintiles 4 and 5 overlapped.
